# Supplementary material
Source: PubMed Central journal article supplement (PMC2992339)
Supplement: NIHMS201043-supplement-1_si_001.pdf [file NIHMS201043-supplement-1_si_001.pdf]

Supporting Information

**Anthracene + Pyrene Solid Mixtures: Eutectic and Azeotropic Character**

James W. Rice\*, Jinxia Fu, Eric M. Suuberg  
Brown University Division of Engineering  
Providence, RI USA 02912  
401-863-2775 (p) 401-863-9120 (f)  
James\_Rice@Brown.edu

**Table S1. Melting temperatures of previously reported binary organic component mixtures that form two eutectics.**

| System                                                        | $T_{\text{fus},1}/\text{K}$ | $T_{\text{fus},2}/\text{K}$ | $x_{1,e1}$ | $T_{\text{fus},e1}/\text{K}$ | $x_{1,e2}$ | $T_{\text{fus},e2}/\text{K}$ |
|---------------------------------------------------------------|-----------------------------|-----------------------------|------------|------------------------------|------------|------------------------------|
| p-dimethylaminobenzaldehyde (1) + resorcinol (2) <sup>8</sup> | 348                         | 382.6                       | 0.2695     | 322.05                       | 0.7209     | 317.05                       |
| 2,4-dinitrophenol (1) + naphthalene (2) <sup>9,10</sup>       | 353                         | 378                         | 0.3158     | 358                          | 0.5        | 367                          |
| p-benzoquinone (1) + pyrene (2) <sup>11</sup>                 | 388                         | 423                         | 0.324      | 392                          | 0.792      | 376                          |
| m-dinitrobenzene (1) + pyrene (2) <sup>11</sup>               | 362                         | 423                         | 0.301      | 363                          | 0.702      | 361                          |
| m-nitrobenzoic acid (1) + pyrene (2) <sup>11</sup>            | 413                         | 423                         | 0.299      | 403                          | 0.902      | 413                          |
| m-dinitrobenzene (1) + phenothiazine (2) <sup>12</sup>        | 362                         | 457                         | 0.302      | 345                          | 0.699      | 343                          |
| m-nitrobenzoic acid (1) + phenothiazine (2) <sup>12</sup>     | 413                         | 457                         | 0.438      | 400                          | 0.8        | 390                          |

**Table S2. Enthalpy of fusion of previously reported binary organic component mixtures that form one eutectic.**

| System                                                    | $\Delta_{\text{fus}}H_1/\text{J}\cdot\text{g}^{-1}$ | $\Delta_{\text{fus}}H_2/\text{J}\cdot\text{g}^{-1}$ | $x_1$  | $\Delta_{\text{fus}}H_e/\text{J}\cdot\text{g}^{-1}$ | $E_{\text{inter}}/\text{J}\cdot\text{g}^{-1}$ |
|-----------------------------------------------------------|-----------------------------------------------------|-----------------------------------------------------|--------|-----------------------------------------------------|-----------------------------------------------|
| benzamide (1) + benzoic acid (2) <sup>6</sup>             | 191.04                                              | 152.70                                              | 0.5122 | 144.68                                              | -27.66                                        |
| o-chloro benzoic acid (1) + benzoic acid (2) <sup>7</sup> | 175.86                                              | 152.70                                              | 0.3292 | 137.44                                              | -22.88                                        |

**Table S3. Enthalpy of fusion of previously reported binary organic component mixtures that form two eutectics.**

| System                                                        | $\Delta_{\text{fus}}H_1/\text{J}\cdot\text{g}^{-1}$ | $\Delta_{\text{fus}}H_2/\text{J}\cdot\text{g}^{-1}$ | $x_{1,e1}$ | $\Delta_{\text{fus}}H_{e1}/\text{J}\cdot\text{g}^{-1}$ | $E_{\text{inter},1}/\text{J}\cdot\text{g}^{-1}$ | $x_{1,e2}$ | $\Delta_{\text{fus}}H_{e2}/\text{J}\cdot\text{g}^{-1}$ | $E_{\text{inter},2}/\text{J}\cdot\text{g}^{-1}$ |
|---------------------------------------------------------------|-----------------------------------------------------|-----------------------------------------------------|------------|--------------------------------------------------------|-------------------------------------------------|------------|--------------------------------------------------------|-------------------------------------------------|
| p-dimethylaminobenzaldehyde (1) + resorcinol (2) <sup>8</sup> | 126.01                                              | 207.07                                              | 0.2695     | 140.11                                                 | -45.12                                          | 0.7209     | 133.12                                                 | -15.52                                          |
| p-benzoquinone (1) + pyrene (2) <sup>11</sup>                 | 181.32                                              | 86.03                                               | 0.324      | 58.81                                                  | -58.09                                          | 0.792      | 141.76                                                 | -19.74                                          |
| m-dinitrobenzene (1) + pyrene (2) <sup>11</sup>               | 143.95                                              | 86.03                                               | 0.301      | 55.22                                                  | -48.25                                          | 0.702      | 84.14                                                  | -42.55                                          |
| m-nitrobenzoic acid (1) + pyrene (2) <sup>11</sup>            | 95.14                                               | 86.03                                               | 0.299      | 79.79                                                  | 8.96                                            | 0.902      | 83.25                                                  | 10.99                                           |
| m-dinitrobenzene (1) + phenothiazine (2) <sup>12</sup>        | 143.95                                              | 142.52                                              | 0.302      | 80.59                                                  | -62.37                                          | 0.699      | 90.71                                                  | -52.81                                          |
| m-nitrobenzoic acid (1) + phenothiazine (2) <sup>12</sup>     | 95.14                                               | 142.52                                              | 0.438      | 72.36                                                  | -49.41                                          | 0.800      | 87.58                                                  | -17.03                                          |

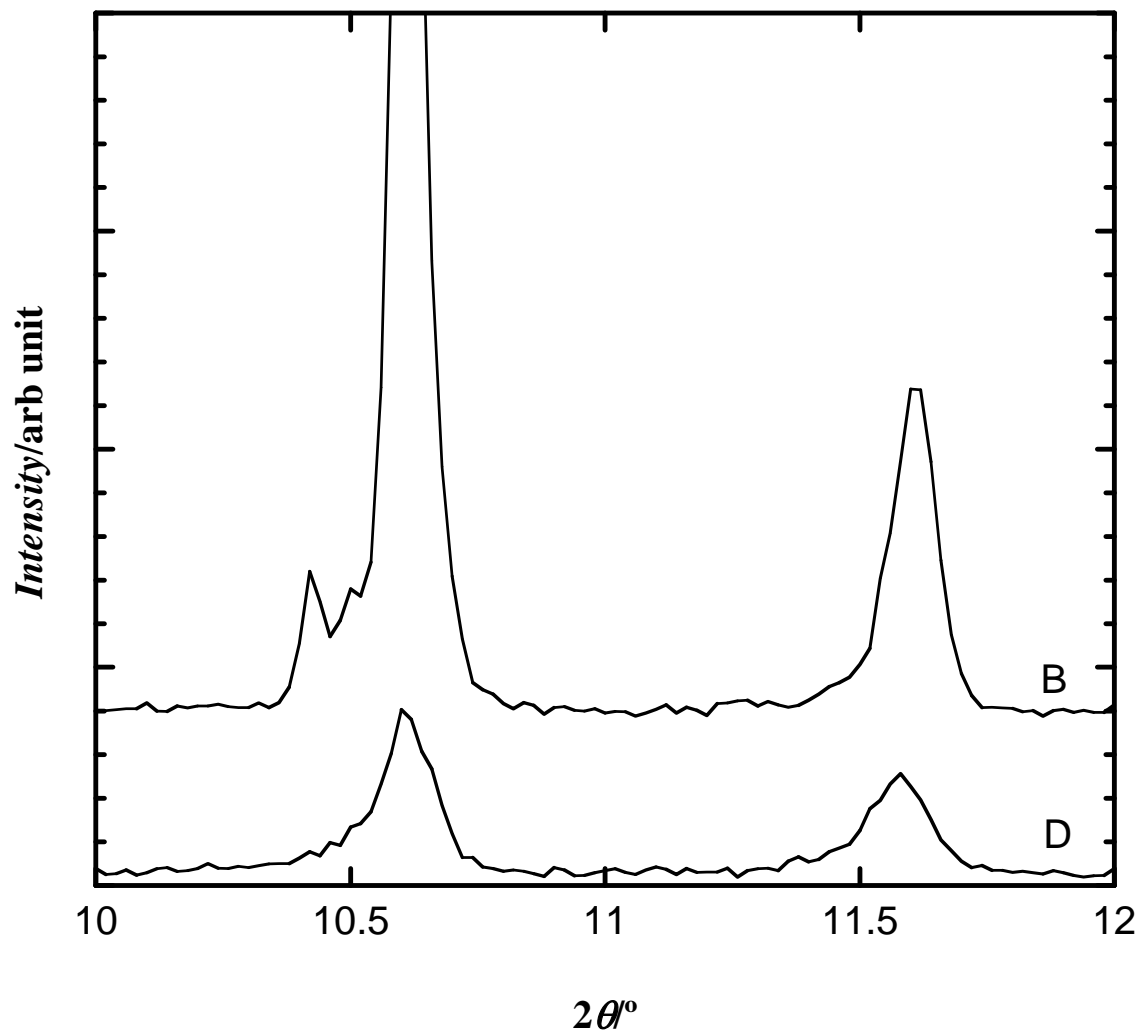

Figure S1. Magnified portion of X-ray diffraction pattern from Figure 4 that shows the modified-pyrene peaks in the eutectic anthracene (1) + pyrene (2) mixture: B, pure (2); D, eutectic mixture  $x_1 = 0.22$ .

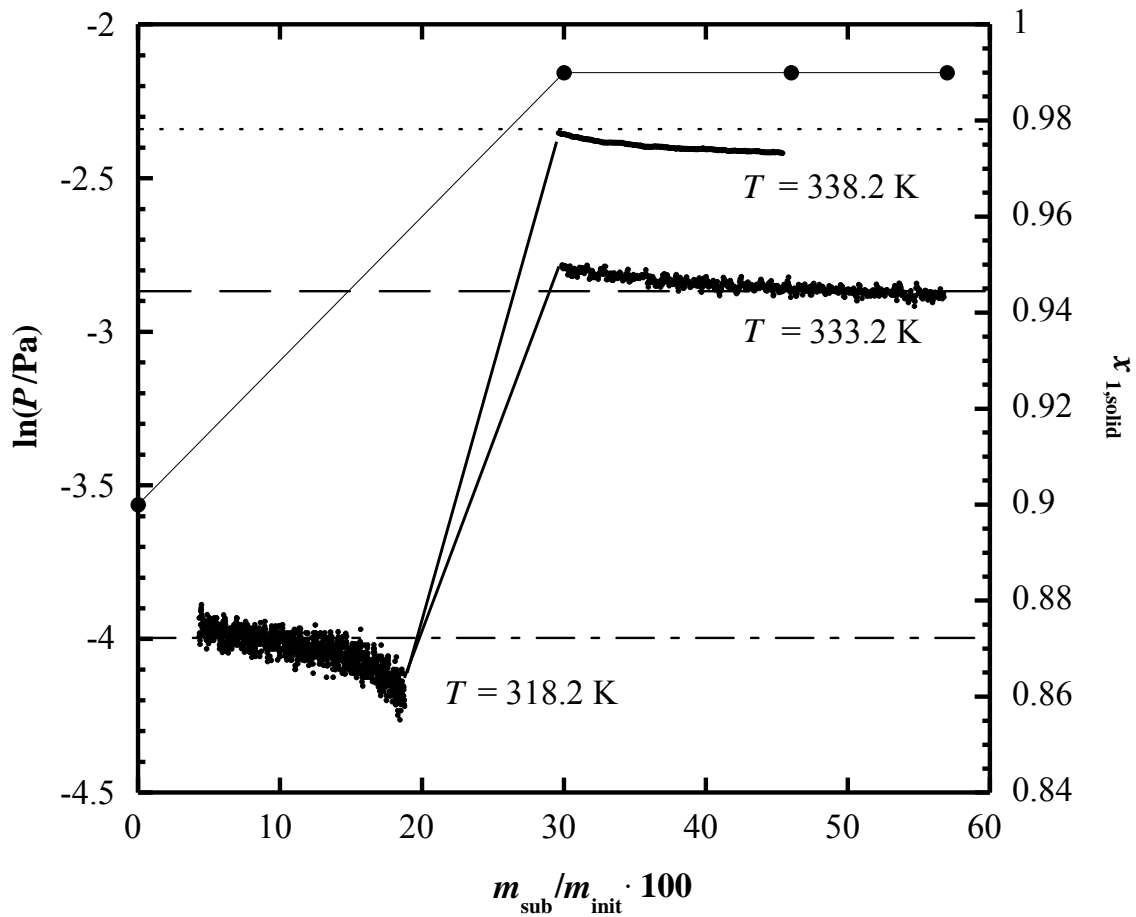

Figure S2. Vapor pressure and composition of an anthracene-rich mixture versus sample mass loss: —,  $P_{\text{measured}}$ ; ···,  $P_{1, 338.2 \text{ K}}$ ; — — —,  $P_{1, 333.2 \text{ K}}$ ; -·-·-,  $P_{\text{max}, 318.2 \text{ K}}$ ; —●—, measured  $x_1$  of solid mixture.

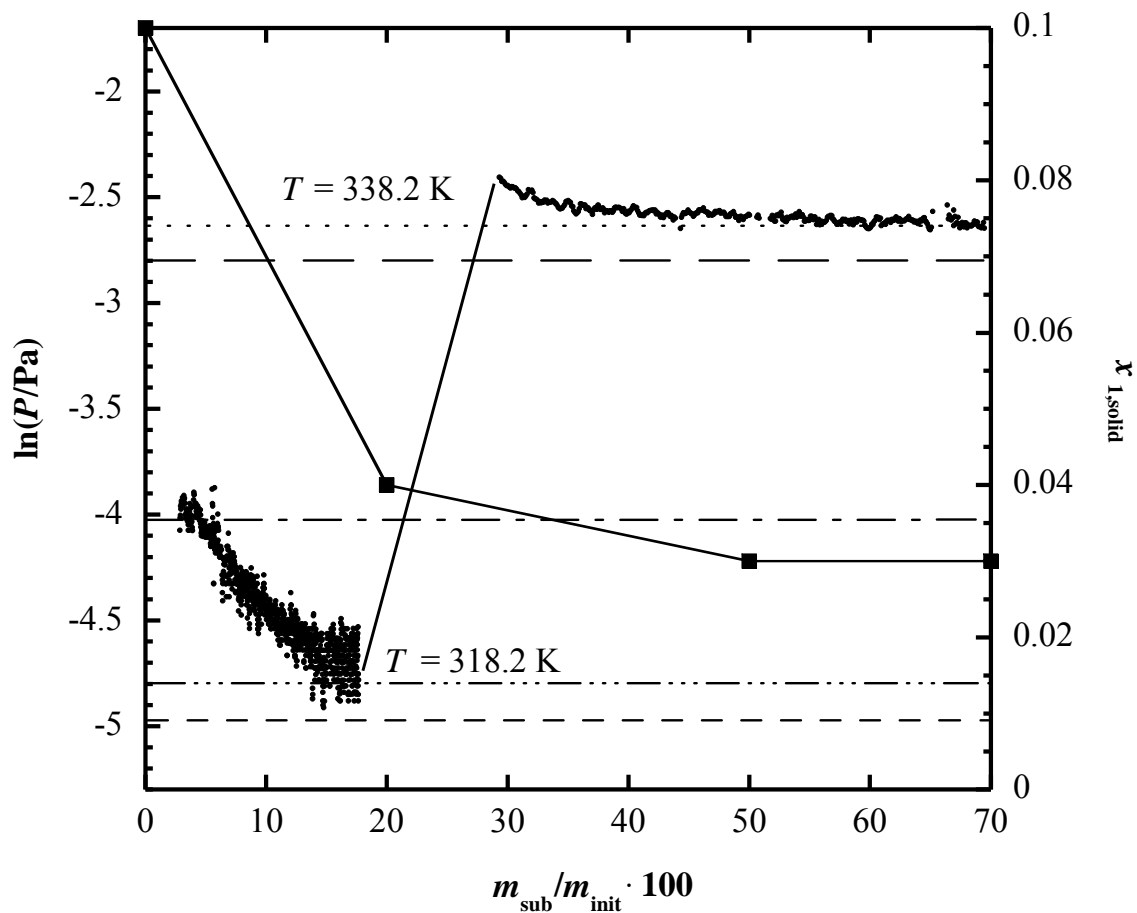

Figure S3. Vapor pressure and composition of a pyrene-rich mixture versus sample mass loss: —,  $P_{\text{measured}}$ ; - - -,  $P_{2, 318.2 \text{ K}}$ ; - · · · -,  $P_{318.2 \text{ K}}$  of azeotrope at  $x_1 = 0.14$ ; - - - - -,  $P_{\text{max}, 318.2 \text{ K}}$ ; - - - - -,  $P_{2, 338.2 \text{ K}}$ ; · · · · ·,  $P_{338.2 \text{ K}}$  of azeotrope at  $x_1 = 0.14$ ; -■- measured  $x_1$  of solid mixture.
